# Supplementary material for: Growth of diazonium-functionalized ZnO nanoflakes on flexible carbon cloth for electrochemical sensing of acetone in the liquid phase
Source: Royal Society of Chemistry journal article supplement (doi:10.1039/d3ra01268a), 2023-01-01
Supplement: d3ra01268a1.pdf [file d3ra01268a1.pdf]

## Supplementary Information

### Growth of diazonium functionalized ZnO nanoflakes on flexible carbon cloth for electrochemical sensing of acetone in the liquid phase

Azhar Abbas<sup>a</sup>, Seemal Mansoor<sup>b</sup>, Mian Hasnain Nawaz<sup>b</sup>, Aqif Anwar Chaudhry<sup>b</sup>, Kashif Ijaz<sup>b</sup>  
Sara Riaz<sup>c\*</sup>, Akhtar Hayat<sup>b\*</sup>

<sup>a</sup>Institute of Chemistry, University of Sargodha, Sargodha 40100, Pakistan

<sup>b</sup>Interdisciplinary Research Centre in Biomedical Materials (IRCBM), COMSATS University Islamabad, Lahore Campus, Lahore 54000, Pakistan

<sup>c</sup>Department of Chemistry, COMSATS University Islamabad, Lahore Campus, Lahore 54000, Pakistan

Corresponding Authors \*: [akhtarhayat@cuilahore.edu.pk](mailto:akhtarhayat@cuilahore.edu.pk); [sarahasnain@cuilahore.edu.pk](mailto:sarahasnain@cuilahore.edu.pk)

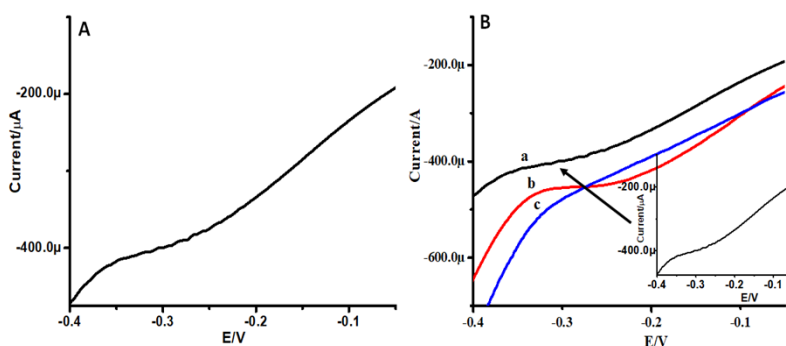

**Fig. S1.** (A) Linear sweep voltammogram of ZnO NFs/ZnO NPs/CC in diazonium salt at scan rate of  $100 \text{ mVs}^{-1}$  (B) at various incubation time (a-0, b-15, and c-30) minutes with a scan rate of  $100 \text{ mVs}^{-1}$ .

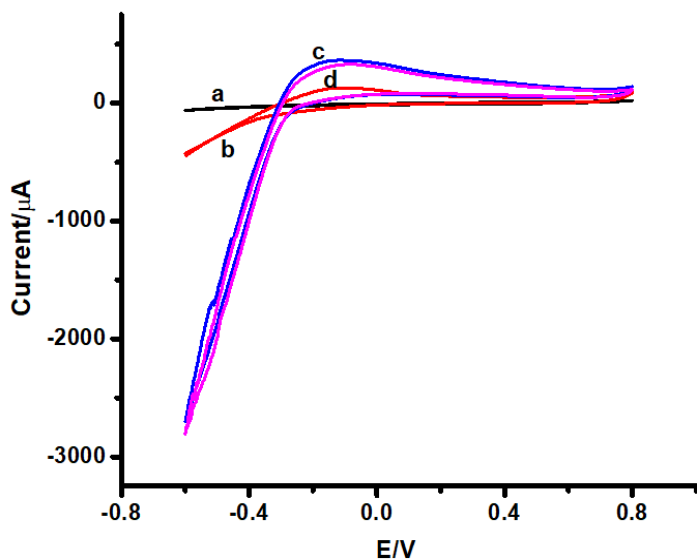

**Fig. S2.** Electrochemical response of acetone (a) bare CC in acetone (0.5 ppm) in PBS (pH 7.4, scan rate  $100 \text{ mVs}^{-1}$ ) (b) upon incubation with NFs modified CC, (c) NFs modified CC in the presence of LSV reduced diazonium reacted acetone (0.5 ppm) at scan rate  $100 \text{ mVs}^{-1}$ , (d) NFs modified CC in acetone (0.5 ppm) & diazonium salt.

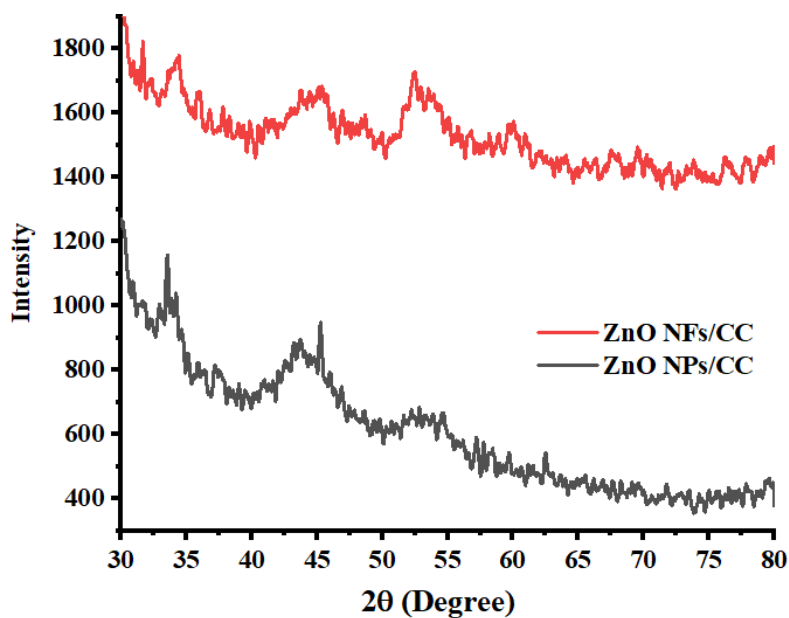

**Fig .S3.** (A) XRD patterns of ZnO NPs/CC and ZnO NFs/CC

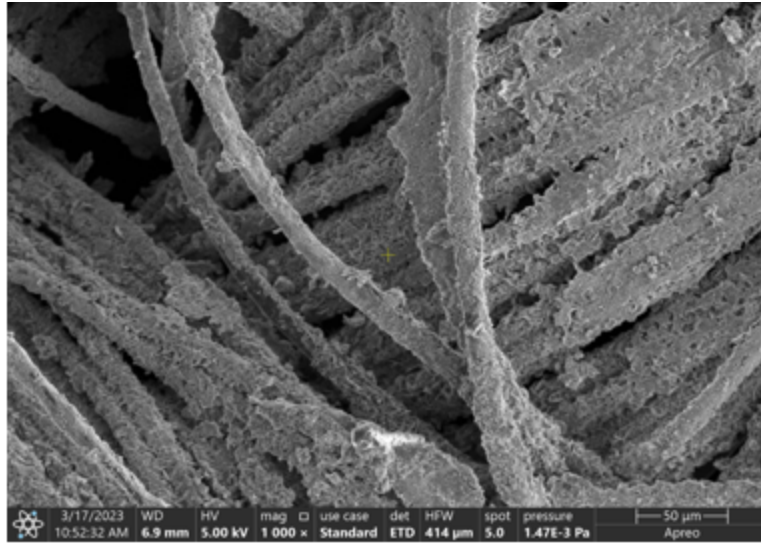

**Fig .S4.** SEM image of ZnO NFs/ZnO NPs/CC after detection of acetone.
